# Supplementary material for: Prediction of Delayed Colonic Transit Using Bristol Stool Form and Stool Frequency in Eastern Constipated Patients: A Difference From the West
Source: PubMed Central journal article supplement — J Neurogastroenterol Motil. 2017 Oct 30;23(4):561–8. doi: 10.5056/jnm17022 (PMC5628989; doi:10.5056/jnm17022), 2017-10-30
Supplement: jnm-23-561_suppl.pdf [file jnm-23-561_suppl.pdf]

**Supplementary Table 1.** Predictors of Delayed Colonic Transit Time by Using Multivariate Logistic Regression Analysis in Irritable Bowel Syndrome and Non-irritable Bowel Syndrome Patients

| Variable                     | Adjusted OR <sup>a</sup> | 95% CI    | P-value |
|------------------------------|--------------------------|-----------|---------|
| IBS                          |                          |           |         |
| Average 5-day BSFS           | 0.62                     | 0.34-1.14 | 0.120   |
| Stool frequency (BMs/5 days) | 0.77                     | 0.53-1.13 | 0.190   |
| Non-IBS                      |                          |           |         |
| Average 5-day BSFS           | 0.51                     | 0.28-0.93 | 0.030   |
| Stool frequency (BMs/5 days) | 0.48                     | 0.27-0.85 | 0.012   |

<sup>a</sup>Adjusted to age, sex, body mass index.

IBS, irritable bowel syndrome; BSFS, Bristol stool form scale; BMs, bowel movements.

**Supplementary Table 2.** Spearman's Correlation of Stool Characteristics and Constipation Symptoms With Geometric Center in Irritable Bowel Syndrome and Non-irritable Bowel Syndrome Patients

|                              | GC day 1          | GC day 3          | GC day 5          |
|------------------------------|-------------------|-------------------|-------------------|
| IBS                          |                   |                   |                   |
| Average 5-day BSFS           | 0.19              | 0.27 <sup>a</sup> | 0.23              |
| Stool frequency (BMs/5 days) | 0.13              | 0.21              | 0.27 <sup>a</sup> |
| Non-IBS                      |                   |                   |                   |
| Average 5-day BSFS           | 0.47 <sup>b</sup> | 0.46 <sup>b</sup> | 0.37 <sup>b</sup> |
| Stool frequency (BMs/5 days) | 0.48 <sup>b</sup> | 0.44 <sup>b</sup> | 0.43 <sup>b</sup> |

<sup>a</sup> $P < 0.05$ .

<sup>b</sup> $P < 0.01$ .

GC, geometric center; IBS, irritable bowel syndrome; BSFS, Bristol stool form scale; BMs, bowel movements.
